# Supplementary material for: Microbiota of Chicken Breast and Thigh Fillets Stored under Different Refrigeration Temperatures Assessed by Next-Generation Sequencing
Source: PubMed Central journal article supplement (PMC8066510; doi:10.3390/foods10040765), 2021-04-03
Supplement: foods-10-00765-s001.pdf [file foods-10-00765-s001.pdf]

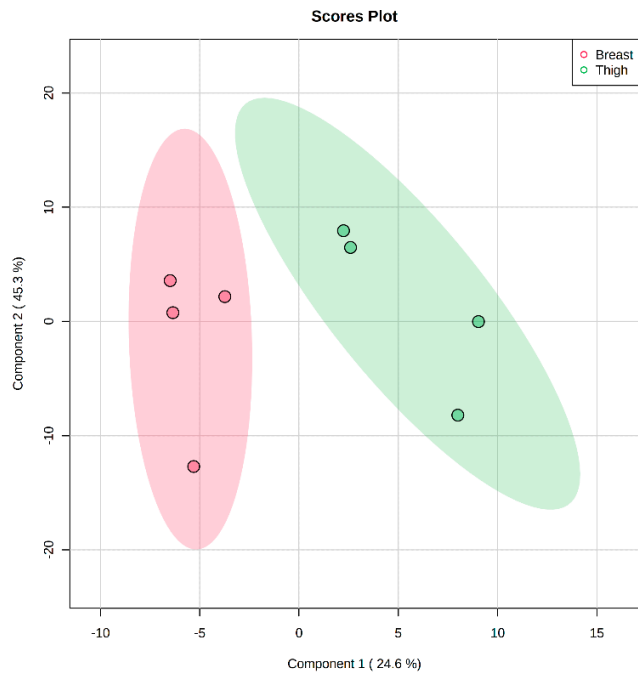

**Figure S1.** Partial least squares discriminant analysis (PLS-DA) clustering of chicken samples depending on chicken part (i.e. breast and thigh fillets).
